# Supplementary material for: Ten Quick Tips for Accurate Reconstruction of Prokaryotic and Eukaryotic Genome-Scale Metabolic Models
Source: Preprints.org preprint supplement (doi:10.20944/preprints202311.0461.v1), 2023-11-07
Supplement: Supplementary file 3 [file S1 Table.docx]

S1 Table. Bioinformatic databases

| **Bioinformatic Database** | **Data Type** | **URL** |
| --- | --- | --- |
| PATRIC (currently incorporated in BV-BCR) | Prokaryotes | <https://www.bv-brc.org/> |
| ViPR (currently incorporated in BV-BCR) | Viruses | <https://www.bv-brc.org/> |
| IRD (currently incorporated in BV-BCR) | Viruses | <https://www.bv-brc.org/> |
| BV-BCR | Prokaryotes and viruses | <https://www.bv-brc.org/> |
| NCBI | Prokaryotes, eukaryotes, and viruses | <https://www.ncbi.nlm.nih.gov/> |
| GenBank | Prokaryotes, eukaryotes, and viruses | https://www.ncbi.nlm.nih.gov/genbank/ |
| RefSeq | Prokaryotes, eukaryotes and viruses | <https://www.ncbi.nlm.nih.gov/refseq/> |
| KEGG | Eukaryotes, prokaryotes, and viruses | <https://www.genome.jp/kegg/> |
| BioCyc | Eukaryotes, prokaryotes, and viruses | <https://biocyc.org/> |
| UniProt | Single proteins | <https://www.uniprot.org/> |
| BRENDA | Single proteins | <https://www.brenda-enzymes.org/> |
| PDB | Single proteins | https://www.rcsb.org/ |
